# Supplementary material for: Predation Risk is a Function of Seasonality Rather than Habitat Complexity in a Tropical Semi-arid Forest
Source: Research Square preprint supplement (doi:10.21203/rs.3.rs-625459/v1), 2021-06-22
Supplement: Supplementary file 1 [file 4f214aba4bc31323c017e868.pdf]

## Supplementary Information

**Article title:** Predation risk is a function of seasonality rather than habitat complexity in a tropical semi-arid forest

**Journal name:** Scientific Reports

**Author names:** Anthony Santana Ferreira<sup>1,2\*</sup> and Renato Gomes Faria<sup>3</sup>

**Affiliations:** <sup>1</sup>Programa de Pós-Graduação em Ecologia e Conservação, Universidade Federal de Sergipe, São Cristóvão-Sergipe, Brazil.

<sup>2</sup>Programa de Capacitação Institucional, Instituto Nacional de Pesquisas da Amazônia (INPA), 69067-375, Manaus, Amazonas, Brazil.

<sup>3</sup>Departamento de Biologia, Universidade Federal de Sergipe (UFS), 49100-000, São Cristóvão, SE, Brazil. Email: renatogfaria@gmail.com

\*Corresponding author: anthonyyferreira@gmail.com

## Figures

**Figure S1** Rainfall data of 2012 and 2013 from the Poço Redondo rainfall station. Source: Secretaria de Meio Ambiente e Recursos Hídricos (SEMARH/SE).

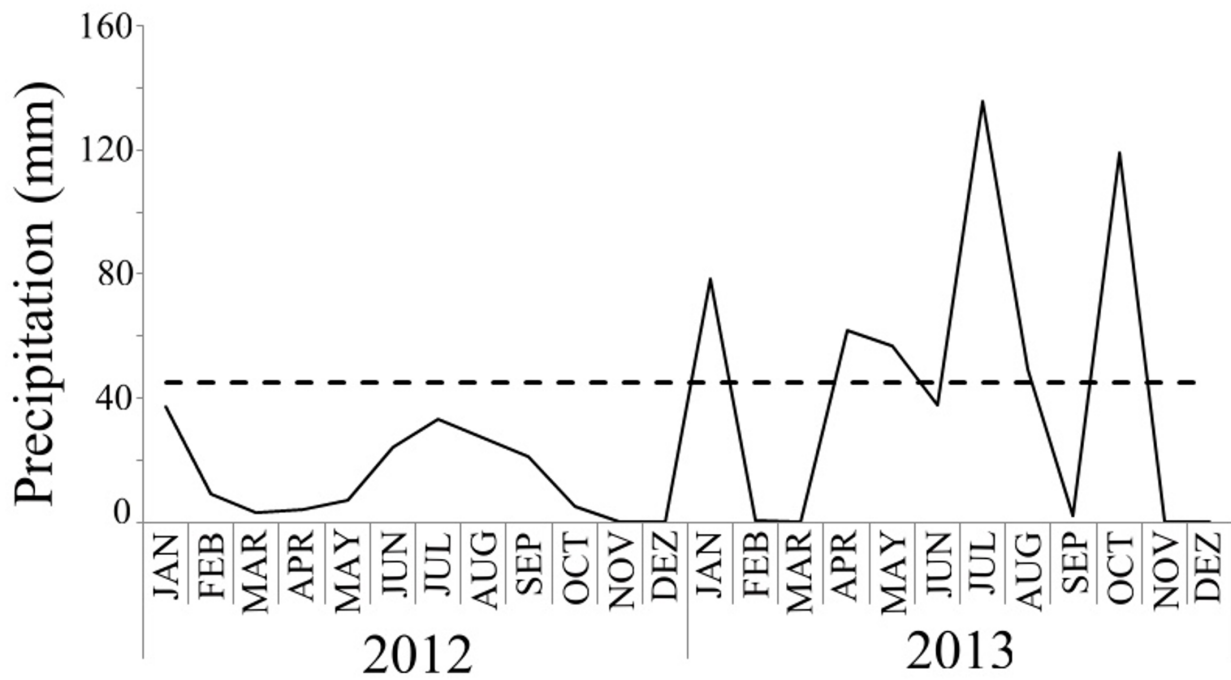

## Tables

**Table S1** Loading resulting from the Principal Component Analysis conducted with eight environmental variables (scaled) throughout all months (general structure) of the three study sites at the Monumento Natural Grota do Angico, Sergipe, Brazil. Abbreviation: (PC) principal component. (EXS) exposed soil. (LEL) leaf litter. (NUS) number of stems. (DNT) distance of nearest tree. (DBH) diameter at breast height of nearest tree. (NFT) number of fallen trunks. (BRO) bromeliads.

|                | PC1     | PC2     | PC3     | PC4     | PC5     | PC6     | PC7     | PC8     |
|----------------|---------|---------|---------|---------|---------|---------|---------|---------|
| EXS            | -0.3056 | 0.4809  | -0.3251 | 0.0466  | -0.0721 | 0.3698  | 0.3979  | -0.5170 |
| LEL            | 0.1637  | -0.4624 | 0.5532  | -0.0901 | -0.2555 | 0.4112  | 0.3756  | -0.2641 |
| ROCK           | 0.3688  | -0.3520 | -0.3286 | 0.1922  | 0.4879  | -0.3190 | 0.3982  | -0.3112 |
| NUS            | 0.4515  | 0.2020  | -0.0938 | -0.2809 | -0.6190 | -0.4499 | -0.0073 | -0.2864 |
| DNT            | -0.4630 | -0.2340 | -0.1042 | 0.3162  | -0.4285 | -0.3592 | 0.4612  | 0.3077  |
| DBH            | -0.3850 | -0.4439 | -0.1307 | 0.1148  | -0.1315 | -0.0879 | -0.5411 | -0.5538 |
| NFT            | 0.2749  | 0.2522  | 0.2580  | 0.8640  | -0.1159 | 0.0214  | -0.1546 | -0.0998 |
| BRO            | 0.3190  | -0.2736 | -0.6140 | 0.1191  | -0.3066 | 0.5028  | -0.1122 | 0.2698  |
| Variance (%)   | 36.3    | 28      | 13.7    | 9.3     | 6.3     | 2.7     | 2.1     | 1.6     |
| Cumulative (%) | 36.3    | 64.3    | 78      | 87.3    | 93.6    | 96.3    | 98.4    | 100     |

**Table S2** Loading resulting from the Principal Component Analysis conducted with eight environmental variables (scaled) throughout dry season (10 months) of the three study sites at the Monumento Natural Grota do Angico, Sergipe, Brazil. Abbreviation: (PC) principal component. (EXS) exposed soil. (LEL) leaf litter. (NUS) number of stems. (DNT) distance of nearest tree. (DBH) diameter at breast height of nearest tree. (NFT) number of fallen trunks. (BRO) bromeliads.

|                | PC1     | PC2     | PC3     | PC4     | PC5     | PC6     | PC7     | PC8     |
|----------------|---------|---------|---------|---------|---------|---------|---------|---------|
| EXS            | -0.3727 | -0.4266 | -0.3487 | 0.0149  | -0.0586 | 0.1011  | -0.0768 | 0.7333  |
| LEL            | 0.3046  | 0.4310  | 0.4758  | -0.1511 | 0.0419  | 0.0014  | 0.1928  | 0.6583  |
| ROCK           | 0.4287  | 0.1791  | -0.3335 | 0.5089  | 0.0479  | -0.4313 | -0.4436 | 0.1699  |
| NUS            | 0.4168  | -0.2211 | -0.1039 | -0.6614 | 0.2749  | 0.1474  | -0.4815 | -0.0016 |
| DNT            | -0.3941 | 0.2531  | -0.0792 | -0.0233 | 0.8601  | -0.1825 | 0.0269  | 0.0064  |
| DBH            | -0.2491 | 0.5418  | -0.0961 | 0.0988  | -0.1321 | 0.6276  | -0.4627 | -0.0047 |
| NFT            | 0.1968  | -0.4259 | 0.4245  | 0.5165  | 0.3644  | 0.4375  | -0.0932 | 0.0027  |
| BRO            | 0.3933  | 0.1110  | -0.5782 | 0.0580  | 0.1644  | 0.4043  | 0.5522  | 0.0035  |
| Variance (%)   | 39.5    | 28.5    | 14.6    | 7.1     | 5.9     | 2.4     | 2       | 0       |
| Cumulative (%) | 39.5    | 68.0    | 82.5    | 89.7    | 95.6    | 98      | 100     | 100     |

**Table S3** Loading resulting from the Principal Component Analysis conducted with eight environmental variables (scaled) throughout rainy season (eight months) of the three study sites at the Monumento Natural Grota do Angico, Sergipe, Brazil. Abbreviation: (PC) principal component, (EXS) exposed soil, (LEL) leaf litter, (NUS) number of stems, (DNT) distance of nearest tree, (DBH) diameter at breast height of nearest tree, (NFT) number of fallen trunks, (BRO) bromeliads.

|                | PC1     | PC2     | PC3     | PC4     | PC5     | PC6     | PC7     | PC8     |
|----------------|---------|---------|---------|---------|---------|---------|---------|---------|
| EXS            | -0.1541 | -0.5023 | 0.1550  | -0.5369 | -0.5833 | 0.1180  | -0.2158 | -0.1048 |
| LEL            | -0.1296 | 0.3411  | -0.7615 | -0.2497 | -0.1092 | 0.4513  | -0.0444 | -0.0841 |
| ROCK           | 0.1821  | 0.5421  | 0.2308  | 0.2537  | -0.4882 | 0.0096  | -0.5601 | 0.0567  |
| NUS            | 0.4701  | -0.1772 | 0.0908  | -0.2142 | 0.5224  | 0.3769  | -0.5278 | -0.0064 |
| DNT            | -0.5214 | 0.1242  | 0.0603  | -0.2530 | 0.2250  | -0.1205 | -0.2650 | 0.7140  |
| DBH            | -0.4749 | 0.2629  | 0.2026  | -0.1835 | 0.2931  | -0.1730 | -0.2271 | -0.6806 |
| NFT            | 0.4189  | 0.1439  | -0.2751 | -0.4625 | -0.0075 | -0.7151 | -0.0529 | 0.0022  |
| BRO            | 0.1801  | 0.4482  | 0.4629  | -0.4770 | -0.0055 | 0.2906  | 0.4844  | 0.0760  |
| Variance (%)   | 39.5    | 28      | 12.3    | 9.1     | 4.2     | 4.1     | 2.4     | 0.5     |
| Cumulative (%) | 39.5    | 67.4    | 79.7    | 88.8    | 93      | 97.1    | 99.5    | 100     |

**Table S4** Number of lizard replicas used in each experimental site with the overall attacks and in both seasons (upper panel); number of attacks on different body parts of the replicas (middle panel) and number of attacks on replicas placed on different substrates (lower panel).

The rows in italics are to highlight the fact that they are subrows of the upper row.

| Models               | S1 overall | S2 overall | S3 overall | Total overall | S1 rainy   | S2 rainy   | S3 rainy   | Total rainy | S1 dry     | S2 dry     | S3 dry     | Total dry  |                  |
|----------------------|------------|------------|------------|---------------|------------|------------|------------|-------------|------------|------------|------------|------------|------------------|
| Not attacked         | 273        | 269        | 268        | 810           | 145        | 141        | 151        | 437         | 128        | 128        | 117        | 373        |                  |
| Attacked             | 44         | 47         | 39         | 130           | 14         | 17         | 6          | 37          | 30         | 30         | 33         | 93         |                  |
| <i>by birds</i>      | 24         | 34         | 36         | 94            | 10         | 16         | 5          | 31          | 14         | 18         | 31         | 63         |                  |
| <i>by ants</i>       | 9          | 5          | 0          | 14            | 2          | 0          | 0          | 2           | 7          | 5          | 0          | 12         |                  |
| <i>by mammal</i>     | 2          | 0          | 1          | 3             | 0          | 0          | 0          | 0           | 2          | 0          | 1          | 3          |                  |
| <i>by lizards</i>    | 3          | 1          | 0          | 4             | 0          | 0          | 0          | 0           | 3          | 1          | 0          | 4          |                  |
| <i>undetermined</i>  | 6          | 7          | 2          | 15            | 2          | 1          | 1          | 4           | 4          | 6          | 1          | 11         |                  |
| Missing              | 3          | 4          | 13         | 20            | 1          | 2          | 3          | 6           | 2          | 2          | 10         | 14         |                  |
| <b>Total</b>         | <b>320</b> | <b>320</b> | <b>320</b> | <b>960</b>    | <b>160</b> | <b>160</b> | <b>160</b> | <b>480</b>  | <b>160</b> | <b>160</b> | <b>160</b> | <b>480</b> |                  |
| Model parts attacked | S1 overall | S2 overall | S3 overall | Total overall | S1 rainy   | S2 rainy   | S3 rainy   | Total rainy | S1 dry     | S2 dry     | S3 dry     | Total dry  | Expected attacks |
| Head                 | 37         | 41         | 36         | 114           | 12         | 14         | 6          | 32          | 25         | 27         | 30         | 82         | 225.04           |
| Torso                | 27         | 23         | 16         | 66            | 9          | 11         | 1          | 21          | 18         | 12         | 15         | 45         | 438.44           |
| Tail                 | 6          | 5          | 3          | 14            | 1          | 2          | 0          | 3           | 5          | 3          | 3          | 11         | 791.52           |
| <b>Total</b>         | <b>70</b>  | <b>69</b>  | <b>55</b>  | <b>194</b>    | <b>22</b>  | <b>27</b>  | <b>7</b>   | <b>56</b>   | <b>48</b>  | <b>42</b>  | <b>48</b>  | <b>138</b> |                  |
| Substrates           | S1 overall | S2 overall | S3 overall | Total overall | S1 rainy   | S2 rainy   | S3 rainy   | Total rainy | S1 dry     | S2 dry     | S3 dry     | Total dry  | Total placed     |
| Soil                 | 24         | 25         | 21         | 70            | 5          | 3          | 1          | 9           | 19         | 22         | 20         | 61         | 634              |
| Rock                 | 3          | 2          | 8          | 13            | 1          | 2          | 1          | 4           | 2          | 0          | 7          | 9          | 226              |
| Tree                 | 17         | 20         | 10         | 47            | 8          | 12         | 4          | 24          | 9          | 8          | 6          | 23         | 100              |
| <b>Total</b>         | <b>44</b>  | <b>47</b>  | <b>39</b>  | <b>130</b>    | <b>14</b>  | <b>17</b>  | <b>6</b>   | <b>37</b>   | <b>30</b>  | <b>30</b>  | <b>33</b>  | <b>93</b>  | <b>960</b>       |

**Table S5** Result of the models that examine whether the differences between habitat structural complexity and seasonality explained the differences in predation rates of lizard replicas taking into account predations by the giant ant *Dinoponera quadriceps*.

|                                                                                                                                                                                                                                        |
|----------------------------------------------------------------------------------------------------------------------------------------------------------------------------------------------------------------------------------------|
| Between experimental sites: intercept $\pm$ SE = $-1.99 \pm 0.58$ , Wald test, $P < 0.001$ ;<br>experimental sites (S1) $\pm$ SE = $-0.09 \pm 0.23$ , Wald test, $P = 0.72$ ; (S3) $\pm$ SE = $-0.21 \pm 0.24$ , Wald test, $P = 0.39$ |
|----------------------------------------------------------------------------------------------------------------------------------------------------------------------------------------------------------------------------------------|

|                                                                                                                                                    |
|----------------------------------------------------------------------------------------------------------------------------------------------------|
| Between seasons: intercept $\pm$ SE = $-1.29 \pm 0.11$ , Wald test, $P < 0.001$ ; seasonality $\pm$ SE = $-1.59 \pm 0.23$ , Wald test, $P < 0.001$ |
|----------------------------------------------------------------------------------------------------------------------------------------------------|
