# Supplementary material for: Predation Risk is a Function of Seasonality Rather than Habitat Complexity in a Tropical Semi-arid Forest
Source: Research Square preprint supplement (doi:10.21203/rs.3.rs-625459/v1), 2021-06-22
Supplement: Supplementary file 1 [file 5bb9ea53fd8a6a757fbdd5cc.docx]

**Table 1**.Environmental variables measured at three study sites at Grota do Angico Natural Monument (GAMN), Sergipe, Brazil. Values correspond to the mean ± SD of data collected for 32 quadrat frames in each site. DBH - diameter at breast height of nearest tree.

| **Environmental variables** | **Sites** | | |
| --- | --- | --- | --- |
| **S1** | **S2** | **S3** |
|  |  |  |
| Exposed soil | 0.69 ± 1.67 | 2.25 ± 4.01 | 11.7 ± 6.93 |
| Leaf litter | 23.15 ± 2.05 | 19.63 ± 5.05 | 12.8 ± 6.92 |
| Rock | 1.25 ± 1.09 | 3.02 ± 2.58 | 0.04 ± 0.17 |
| Number of stems | 1.39 ± 0.52 | 2.46 ± 1.12 | 1.52 ± 0.78 |
| Distance of nearest tree | 19.06 ± 12.28 | 12.62 ± 11.38 | 15.01 ± 9.47 |
| DBH of the nearest tree | 18.39 ± 8.34 | 16.27 ± 6.83 | 10.89 ± 5.36 |
| Number of fallen trunks | 1.04 ± 0.83 | 0.98 ± 0.81 | 0.79 ± 0.86 |
| Bromeliads | 0.06 ± 0.18 | 3.50 ± 4.65 | - |
